# Supplementary material
Source: PubMed Central journal article supplement (PMC2940248)
Supplement: NIHMS233505-supplement-Table.pdf [file NIHMS233505-supplement-Table.pdf]

1 **Supplemental Table S1. Means of viable eggs exposed and their survivorship, as measured by hatchability, in six cemeteries in**  
 2 **two years. N=12 for each mean**

| Cemetery          | 2001               |                       |                       |                    |                       |                       | 2006               |                       |                       |                    |                       |                       |                   |             |
|-------------------|--------------------|-----------------------|-----------------------|--------------------|-----------------------|-----------------------|--------------------|-----------------------|-----------------------|--------------------|-----------------------|-----------------------|-------------------|-------------|
|                   | 2 weeks            |                       |                       | 4 weeks            |                       |                       | 2 weeks            |                       |                       | 4 weeks            |                       |                       |                   |             |
|                   | <i>Ae. aegypti</i> | <i>Ae. albopictus</i> | <i>Ae. albopictus</i> | <i>Ae. aegypti</i> | <i>Ae. albopictus</i> | <i>Ae. albopictus</i> | <i>Ae. aegypti</i> | <i>Ae. albopictus</i> | <i>Ae. albopictus</i> | <i>Ae. aegypti</i> | <i>Ae. albopictus</i> | <i>Ae. albopictus</i> |                   |             |
| Mean no.eggs_(SE) | Mean % hatch (SE)  | Mean no.eggs_(SE)     | Mean % hatch (SE)     | Mean no.eggs_(SE)  | Mean % hatch (SE)     | Mean no.eggs_(SE)     | Mean % hatch (SE)  | Mean no.eggs_(SE)     | Mean % hatch (SE)     | Mean no.eggs_(SE)  | Mean % hatch (SE)     | Mean no.eggs_(SE)     | Mean % hatch (SE) |             |
| Oak Hill          | 146 (33.5)         | 90.7 (3.4)            | 57 (9.5)              | 69.2 (7.6)         | 51 (12.8)             | 81.9 (8.6)            | 12 (4.5)           | 43.2 (11.7)           | 225 (107.4)           | 67.6 (12.9)        | 207 (62.3)            | 51.9 (12.3)           | 52 (13.5)         | 27.5 (11.7) |
| Orange Hill       | 106 (22.4)         | 66.7 (7.6)            | 55 (13.3)             | 11 (4.0)           | 58 (10.1)             | 67.5 (6.4)            | 27 (6.1)           | 7.3 (3.0)             | 234 (47.8)            | 37.4 (12.7)        | 283 (33.1)            | 14.6 (9.8)            | 112 (31.5)        | 15.0 (10.2) |
| Joshua Creek      | 126 (17.0)         | 93.8 (1.1)            | 71 (6.8)              | 52.1 (8.5)         | 24 (5.8)              | 64.1 (9.9)            | 29 (6.6)           | 9.6 (5.2)             | 542 (80.1)            | 48.8 (15.8)        | 517 (91.5)            | 19.0 (8.8)            | 71 (33.9)         | 0.6 (0.6)   |
| Palmetto          | 96 (16.6)          | 88.4 (8.1)            | 58 (9.7)              | 29.2 (7.4)         | 59 (15.0)             | 80.9 (10.4)           | 22 (7.7)           | 6.3 (2.9)             | 945 (135.4)           | 68.6 (11.2)        | 323 (66.6)            | 19.9 (9.8)            | 112 (34.1)        | 9.4 (6.5)   |
| Ft. Denaud        | 106 (20.1)         | 79.6 (10.9)           | 94 (14.1)             | 64.2 (9.1)         | 54 (18.5)             | 63.3 (12.8)           | 48 (18.2)          | 47.3 (12.5)           | 218 (55.7)            | 49.4 (14.9)        | 235 (36.3)            | 40.9 (14.1)           | 159 (35.1)        | 35.7 (11.2) |
| Ft. Myers         | 38 (8.6)           | 77.5 (13.6)           | 57 (13.1)             | 72.6 (11.4)        | 30 (6.7)              | 73.5 (11.10)          | 47 (10.6)          | 58.5 (12.6)           | 111 (37.5)            | 22.0 (10.9)        | 138 (21.8)            | 23.7 (12.2)           | 100 (20.5)        | 29.5 (12.6) |
